# Supplementary material for: Elimination of macrophage-entrapped antibiotic-resistant bacteria by a targeted metal–organic framework-based nanoplatform
Source: Royal Society of Chemistry journal article supplement (doi:10.1039/d0cc08340b), 2021-01-01
Supplement: d0cc08340b1.pdf [file d0cc08340b1.pdf]

## Supporting Information

### Elimination of macrophage-entrapped antibiotic-resistant bacteria by a targeting metal-organic framework-based nanoplatform

Xuemeng Liu,<sup>ab</sup> Qingqing Deng,<sup>ab</sup> Lu Zhang,<sup>ac</sup> Yanjuan Sang,<sup>ab</sup> Kai Dong,<sup>\*ac</sup> Jinsong Ren<sup>\*abc</sup> and Xiaogang Qu<sup>\*abc</sup>

#### Materials

Zinc acetate dihydrate ( $\text{Zn}(\text{CH}_3\text{COOH})_2 \cdot 2\text{H}_2\text{O}$ ,  $\geq 99\%$ ), Zinc phthalocyanine (ZnPc, 97%), imidazole-2-carboxyaldehyde (2-ICA,  $\text{C}_4\text{H}_4\text{N}_2\text{O}$ , 98%), 2-Amino-2-deoxy-D-mannose hydrochloride, Methanol (AR), N,N-Dimethylformamide (DMF), Dulbecco's modified eagle's medium (DMEM), fetal bovine serum (FBS), ampicillin, 4',6-diamidino-2-phenylindole (DAPI), Rhodamine B, Sodium hydroxide (NaOH), hydrochloride (HCl, assay 37%), phosphate-buffered saline (PBS, pH = 7.4) buffer, 2',7'-dichlorofluorescein diacetate (DCFH-DA), 3-(4,5-dimethylthiazol-2-yl)-2,5-diphenyltetrazolium bromide (MTT) and dimethyl sulfoxide (DMSO) were purchased commercially and used as-received.

#### Instruments

The morphology of the nanocompounds was characterized by field-emission scanning electron microscopy (Hitachi S4800) and transmission electron microscopy (TEM) (FEI Tecnai G2 F20). X-ray diffractometer (XRD) measurements were performed on a Bruker D8 FOCUS using Cu  $K\alpha$  radiation. The UV-Vis absorption spectra were recorded using a JASCO V550 UV-Visible spectrophotometer. Fluorescence measurements were carried out on a JASC FP-6500 spectrofluorometer.

#### Experimental Section

**Synthesis of ZnPc@ZIF-90 and ZnPc@ZIF-90-M.** For the preparation of ZnPc@ZIF-90 nanoparticles, each 2 mL of imidazole-2-carboxyaldehyde (2-ICA) (0.2 M) and  $\text{Zn}(\text{CH}_3\text{COOH})_2 \cdot 2\text{H}_2\text{O}$  (0.1 M) with 5 mg/mL ZnPc in DMF was mixed under vigorous stirring for 5 min. Then another 10 mL DMF was added for another 10

min stirring. The mixture was purified by washing with DMF and ethanol for three times and collected under centrifugation. The ZnPc@ZIF-90 nanoparticles were dried in vacuum at room temperature overnight and stored at 4°C avoiding light. In addition, ZIF-90 was prepared without the addition of ZnPc.

For the preparation of ZnPc@ZIF-90-M, D-Mannosamine hydrochloride and ZnPc@ZIF-90 at the ratio of one-to-ten was added to 25 mL methanol in round-bottomed flask (50 mL). After mixing, the solution was further stirred at room temperature for 48 h, and particles were separated by centrifugation and washed with methanol and water to remove excess mannosamine. After that, the product was dried by lyophilization.

**ROS Production Ability of ZnPc@ZIF-90-M.** DCFH was utilized as a probe for measuring ROS in tubes, which was obtained by hydrolyzing DCFH-DA according to the literature. To test the generated ROS, DCFH (10  $\mu\text{M}$ ) was mixed with ZnPc@ZIF-90-M (100  $\text{mg mL}^{-1}$ ). Then, the mixture was irradiated with  $638 \pm 10$  nm light at the power of 90 mW for 10 min. After the irradiation, the fluorescence intensities under 488 nm excitation ( $\lambda_{\text{ex}}$  of DCFH) were detected to determine the ROS generation efficiency. Furthermore, the variation tendency of fluorescence intensity of DCF at 522 nm was detected with different concentrations of ZnPc@ZIF-90-M and the irradiation time.

**Planktonic Bacterial Culture and Antibacterial Experiments.** Monocolony of MRSA on the Luria-Bertani (LB) agar plate were transferred to LB culture medium (20 mL) and grown at 37°C under 180 rpm rotation for 12 h. Then, the bacteria were diluted to  $10^8$  CFU·mL<sup>-1</sup>. The 500  $\mu\text{L}$  of obtained solution was treated with the as-obtained materials at different concentrations with and without  $638 \pm 10$  nm light irradiation at the power of 90 mW for 10 min. For solid medium culture, the bacteria solution was diluted  $10^{-4}$  times after irradiation. 100  $\mu\text{L}$  of diluted bacterial solution was streaked on the tryptone agar plates by spread plate method. The plates were cultured at 37 °C for 12 h and the number of colony forming units (CFUs) was counted.

**Cell Culture.** Raw 264.7 mouse macrophage cells were cultured in DMEM medium containing 100  $\mu\text{g mL}^{-1}$  streptomycin, 10% heat inactivated FBS, 100 U mL<sup>-1</sup> penicillin,

and maintained in a humidified incubator with 5% CO<sub>2</sub> at 37°C for 2 days. The Raw 264.7 cells were used for bacteria invasion experiments when they reached 80% confluence.

**MTT assay of macrophage.** The viabilities of Raw264.7 cells were determined by MTT assay. After incubation with different concentrations of ZnPc@ZIF-90-M in 96 well plates, the macrophage cells in DMEM medium were irradiated under 638 ± 10 nm light at the power of 90 mW for 10 min or not. The treated macrophage cells were further incubated at 37°C with 5% CO<sub>2</sub> for 24 h. Then, they were all proceeded to run MTT assay to study their viabilities. The serum-containing medium was replaced with serum-free medium and MTT reagent (5 mg/mL) in Raw264.7 cell cultures. Raw 264.7 cells were incubated at 37°C for 4 h. The culture medium was then removed and 100 µL DMSO was added. The plate was shaken on an orbital shaker for 15 min. The sample was analyzed with the microplate reader to detect absorbance at 570 nm.

**Microscopic observation of mannosyl ligand-mediated cell internalization of as-prepared nanoparticles.** RB@ZIF-90 and RB@ZIF-90-M were synthesised by the modified methods of ZnPc@ZIF-90 and ZnPc@ZIF-90-M respectively, only to replace ZnPc with Rhodamine B. Rhodamine B or Rhodamine B-loaded RB@ZIF-90 or RB@ZIF-90-M (1 µg mL<sup>-1</sup> of Rhodamine B, final concentration) were incubated with Raw264.7 cells (1×10<sup>5</sup>) in 0.5 mL complete DMEM culture medium. For microscopic observation, Raw264.7 cells (1×10<sup>5</sup>) were seeded on coverslips in 24-well tissue culture plates and cultured overnight. Rhodamine B or RB@ZIF-90 or RB@ZIF-90-M were added to distinct wells and incubated at 37°C for 4 h in 0.5 mL of fresh complete DMEM culture medium. The cells were washed twice with ice-cold PBS and fixed with fresh 4% paraformaldehyde for 10 min at room temperature. The cells were counterstained with 4',6-diamidino-2-phenylindole (DAPI) for the cell nucleus and FITC phalloidin (Yeasen Biotechnology (Shanghai) Co., CN) for the cytoskeleton following the manufacturer's instructions. The coverslips were mounted on glass microscope slides and the slides were visualized under a laser scanning confocal microscope.

**The localization of bacteria and NPs in macrophage.** Raw264.7 cells (1×10<sup>5</sup>) were

seeded on coverslips in 24-well plate and incubated 20 h at 37°C with 5% CO<sub>2</sub>. Then, the medium of each well was replaced with 500 µL fresh complete medium containing MRSA solution at a ratio of 20 (bacteria/macrophage). After 1 h infection, the medium was removed and the samples were washed with PBS for 3 times to remove the bacteria outside of macrophages. Then, antibiotic gentamycin (50 µg mL<sup>-1</sup>) was added into infected macrophages with an incubation time of 60 min, to eliminate MRSA adhered to the surface of macrophage cells. The samples were wash with PBS for 3 times to remove the added gentamycin and dead bacteria, followed by adding 500 µL of fresh medium containing ZnPc@ZIF-90-M (100 µg mL<sup>-1</sup>). After 4 h incubation at 37 °C, the medium was removed and washed with PBS for three times to remove the NPs, which was followed by the addition of DAPI (2 µg/mL) for cell nuclei labeling in 15 min incubation. Samples were then washed three times with PBS for intracellular bacteria imaging by using CLSM.

**Ablation of bacteria in macrophage.** To measure the intracellular bacteria ablation effect, macrophages were infected with MRSA at a ratio of 20 bacteria per macrophage. After 1 h infection, the medium was removed and washed with fresh culture medium to wash away extracellular MRSA. Fresh culture medium containing 50 µg mL<sup>-1</sup> gentamycin was then added and incubated for 1 h to inhibit the growth of extracellular bacteria on the surface of Raw 264.7 cells. After that, ampicillin (100 µg mL<sup>-1</sup>), ZIF-90 (100 µg mL<sup>-1</sup>) or ZnPc@ZIF-90-M (100 µg mL<sup>-1</sup>) were added into the culture medium and incubated for 4 h. Then, the infected macrophages were irradiated with and without 638 ± 10 nm light at the power of 90 mW for 10 min. The survival of intracellular bacteria was assessed by using plate colony counting method. Macrophages were lysed with PBS solution supplemented with 1 % Triton-X, and serial dilutions of the lysate were made in PBS. The number of the surviving intracellular bacteria was determined by plating on LB agar plates.

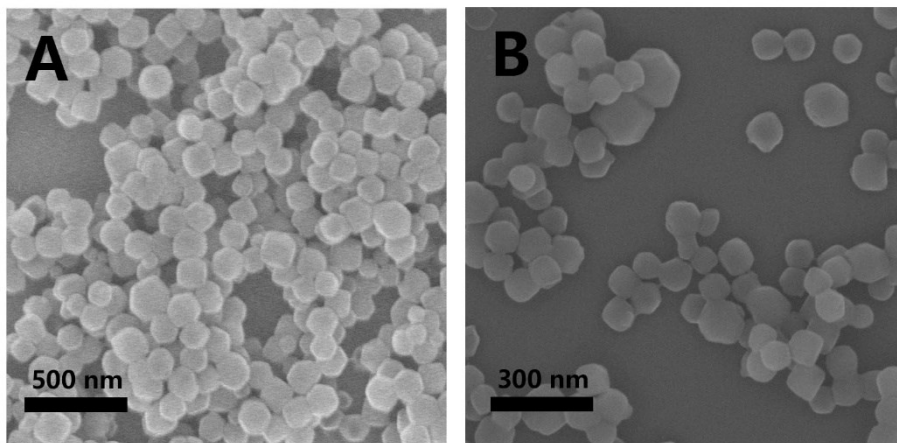

Figure S1. SEM images of ZnPc@ZIF-90 (A) and ZIF-90 (B).

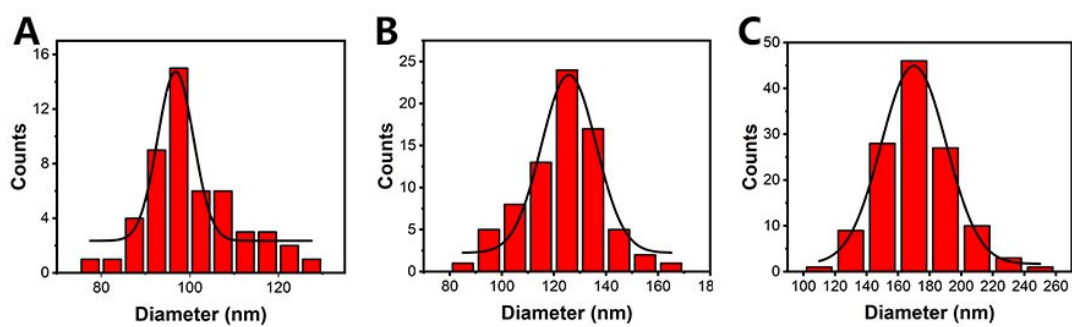

Figure S2. Size distribution histograms of ZIF-90 (A), ZnPc@ZIF-90 (B) and ZnPc@ZIF-90-M (C).

Table S1. Hydrodynamic size, PDI and Zeta potentials of ZnPc@ZIF-90-M.

|               | Hydrodynamic size<br>(nm) | PDI   | Zeta potentials<br>(mV) |
|---------------|---------------------------|-------|-------------------------|
| ZnPc@ZIF-90-M | 269.9±4.8                 | 0.022 | 11.1                    |

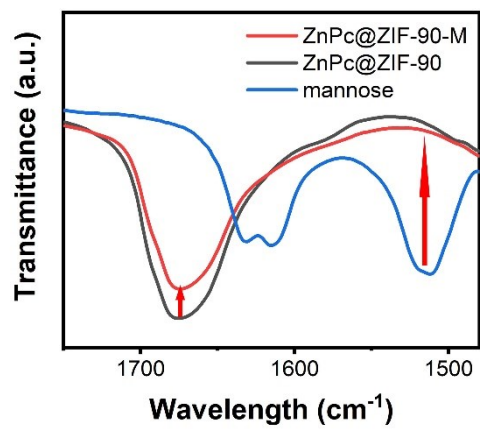

Figure S3. FT-IR spectra of ZnPc@ZIF-90, ZnPc@ZIF-90-M and Mannose.



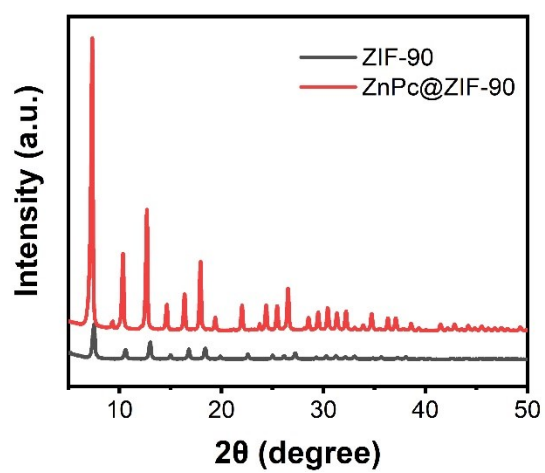

Figure S4. XRD patterns of ZIF-90 and ZnPc@ZIF-90.

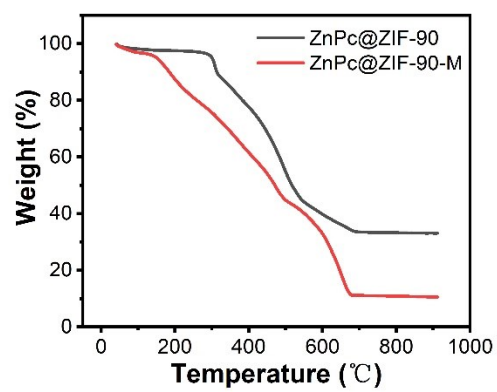

Figure S5. TGA curves of ZnPc@ZIF-90 and ZnPc@ZIF-90-M

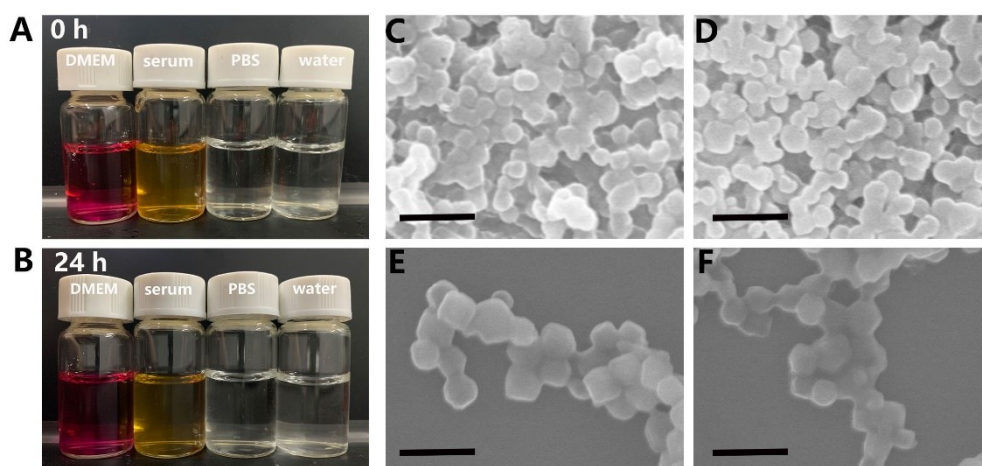

Figure S6. Photograph of ZnPc@ZIF-90-M dissolved in different solutions including DMEM, serum, PBS and water for 0 h (A) and 24 h (B). SEM images of ZnPc@ZIF-90-M dissolved in DMEM (C), serum (D), PBS (E) and water (F) after 24 h, and the scale bars represent 500 nm.

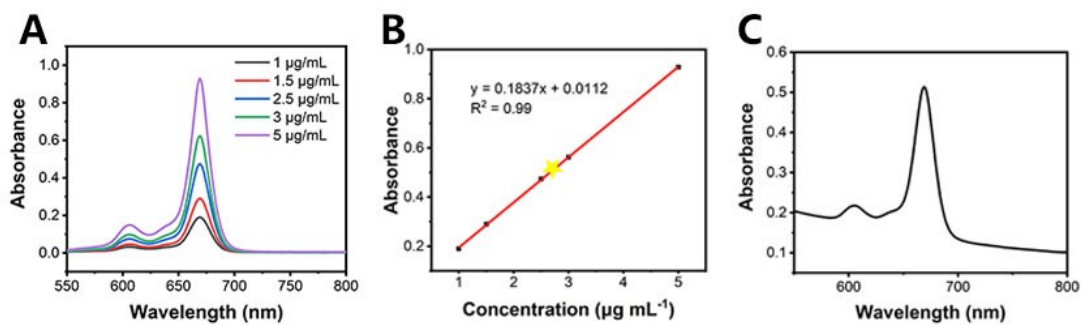

Figure S7. The loading amount of ZnPc on ZnPc@ZIF-90-M was calculated by UV-Vis spectrum. (A) Absorption spectrum of ZnPc with various concentrations from 1  $\mu\text{g mL}^{-1}$  to 5  $\mu\text{g mL}^{-1}$  in DMF. (B) The standard curve: the absorbance at 670 nm as a function of ZnPc concentration. The yellow star stands for the absorption at 670 nm of ZnPc@ZIF-90-M (0.5  $\text{mg mL}^{-1}$ ). (C) Absorption spectrum of ZnPc@ZIF-90-M with the concentration of 0.5  $\text{mg mL}^{-1}$  in DMF.

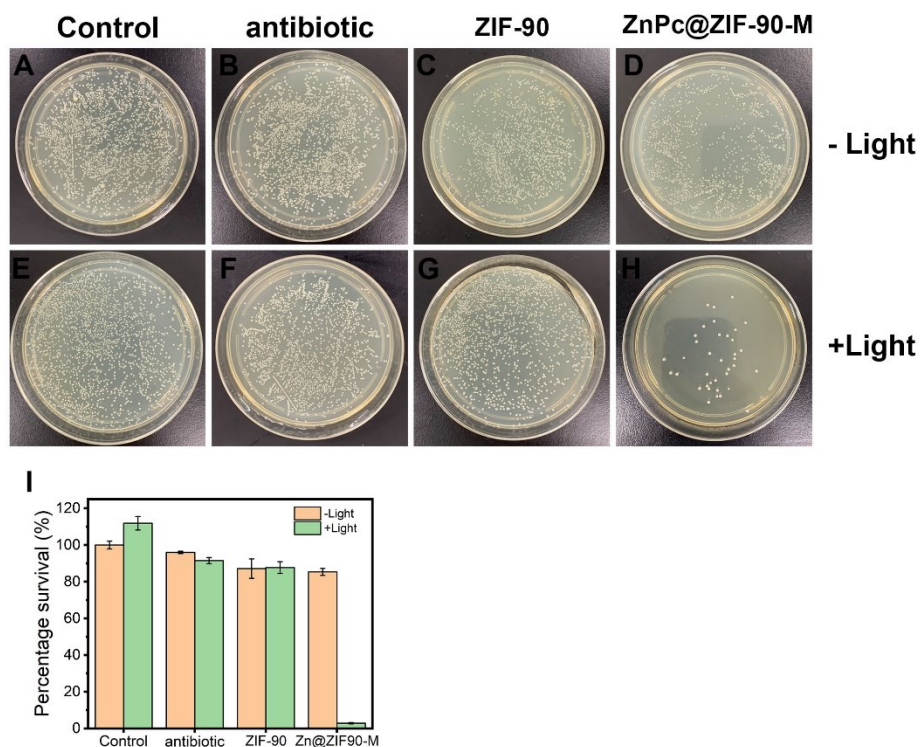

Figure S8. MRSA colonies on agar plates after treating with A) PBS, B) antibiotic, C) ZIF-90, D) ZnPc@ZIF-90-M, and E) PBS + light, F) antibiotic + light, G) ZIF-90 + light, H) ZnPc@ZIF-90-M + light. Antibiotic ( $100 \mu\text{g mL}^{-1}$  ampicillin), ZIF-90 ( $100 \mu\text{g mL}^{-1}$ ), ZnPc@ZIF-90-M ( $100 \mu\text{g mL}^{-1}$ ). (I) Percentage survival of MRSA after different treatments.

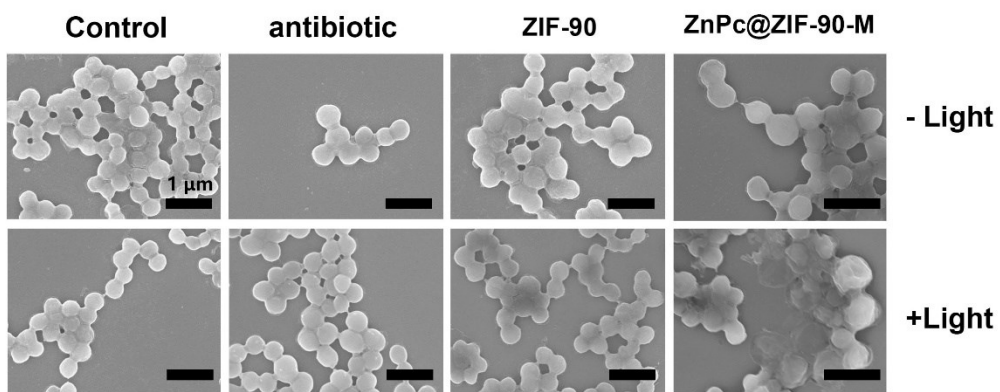

Figure S9. The SEM images of MRSA samples after different treatments. The scale bars represent 1  $\mu\text{m}$ .

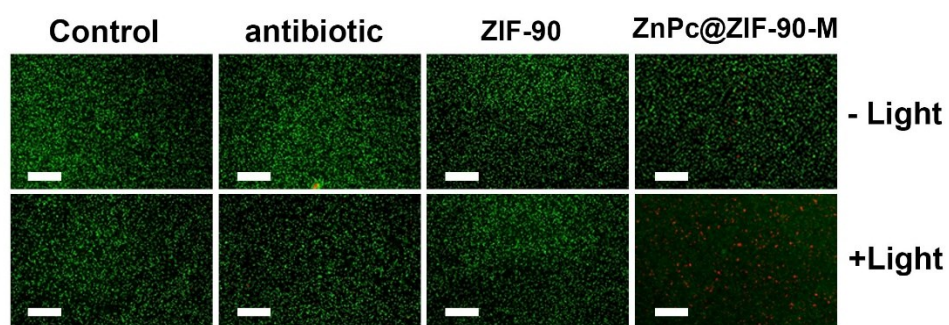

Figure S10. Live-dead fluorescence images of MRSA treated with different groups. Viable cells were stained green with FDA, and dead cells were stained red with PI. Scale bars represented 100  $\mu\text{m}$ .

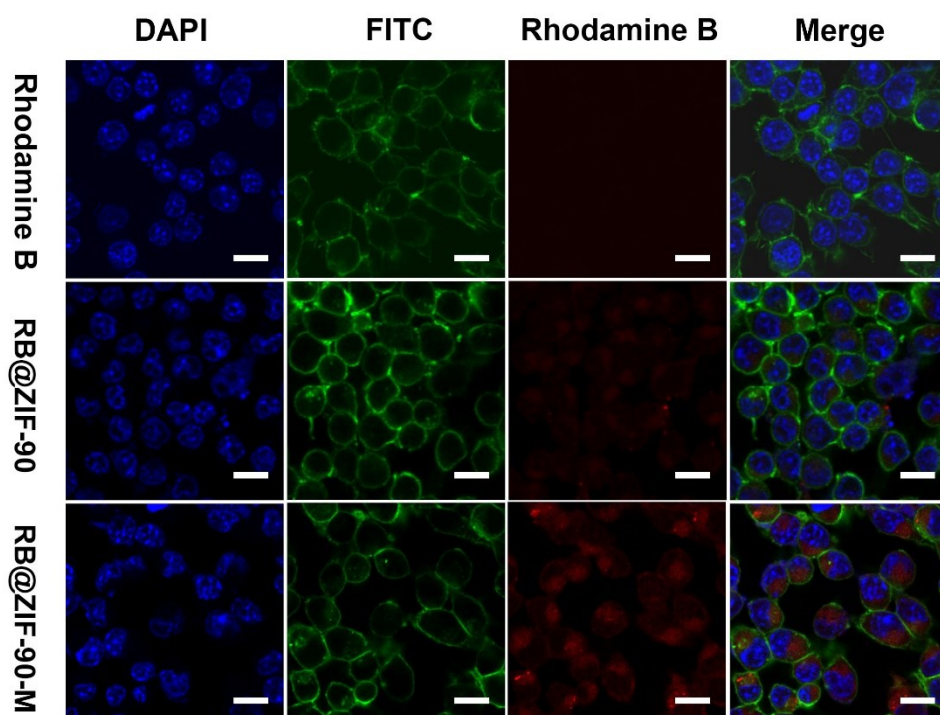

Figure S11. Confocal microscopy observation of cellular fluorescence intensity of Raw 264.7 cells incubated with Rhodamine B, RB@ZIF-90 and RB@ZIF-90-M. The scale bars represent 20  $\mu\text{m}$ .



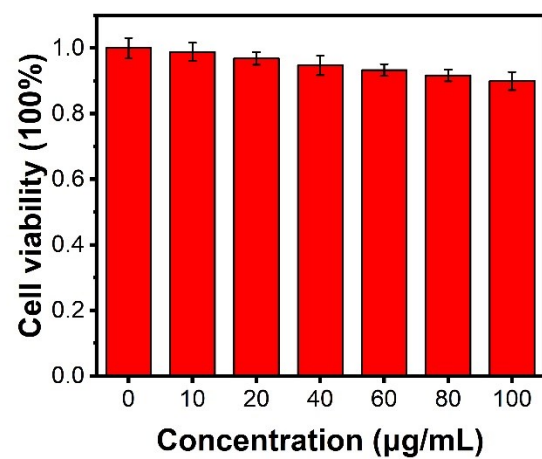

Figure S12. Cell viability of Raw 264.7 cells after incubated with ZnPc@ZIF-90-M for 24 h in the dark.
